1 **Guidelines for extracting biologically relevant context-specific metabolic**  
2 **models using gene expression data**

3 Saratram Gopalakrishnan<sup>1</sup>, Chintan J. Joshi<sup>1</sup>, Miguel Valderrama Gomez<sup>2</sup>, Elcin Icten<sup>2</sup>, Pablo  
4 Rolandi<sup>2</sup>, William Johnson<sup>2</sup>, Cleo Kontoravdi<sup>3</sup>, Nathan E. Lewis<sup>1,4\*</sup>

5 <sup>1</sup> Department of Pediatrics, University of California San Diego

6 <sup>2</sup> Digital Integration and Predictive Technologies, Amgen Inc.

7 <sup>3</sup> Department of Chemical Engineering, Imperial College London

8 <sup>4</sup> Department of Bioengineering, University of California San Diego

9

10 \* Corresponding Author

11 Email: [nlewisres@ucsd.edu](mailto:nlewisres@ucsd.edu)

12

## 13 **ABSTRACT**

14 Genome-scale metabolic models comprehensively describe an organism's metabolism and can be  
15 tailored using omics data to model condition-specific physiology. The quality of context-specific  
16 models is impacted by (i) choice of algorithm and parameters and (ii) alternate context-specific  
17 models that equally explain the -omics data. Here we quantify the influence of alternate optima on  
18 microbial and mammalian model extraction using GIMME, iMAT, MBA, and mCADRE. We find  
19 that metabolic tasks defining an organism's phenotype must be explicitly and quantitatively  
20 protected. The scope of alternate models is strongly influenced by algorithm choice and the  
21 topological properties of the parent genome-scale model with fatty acid metabolism and  
22 intracellular metabolite transport contributing much to alternate solutions in all models. mCADRE  
23 extracted the most reproducible context-specific models and models generated using MBA had the  
24 most alternate solutions. There were fewer qualitatively different solutions generated by GIMME  
25 in *E. coli*, but these increased substantially in the mammalian models. Screening ensembles using  
26 a receiver operating characteristic plot identified the best-performing models. A comprehensive  
27 evaluation of models extracted using combinations of extraction methods and expression  
28 thresholds revealed that GIMME generated the best-performing models in *E. coli*, whereas  
29 mCADRE is better suited for complex mammalian models. These findings suggest guidelines for  
30 benchmarking -omics integration algorithms and motivate the development of a systematic  
31 workflow to enumerate alternate models and extract biologically relevant context-specific models.

32 **Keywords:** Systems biology; Metabolic modeling; Constraint-based models; Context-specific  
33 models; Model extraction methods

34

## 35 **1. INTRODUCTION**

36 The physiological state of a cell is mediated by an intricate network of signaling pathways, gene  
37 regulatory networks and metabolic reactions. Gene expression data provide functional insights into  
38 the modulation of cellular phenotype (Manzoni et al., 2018), biological features of disease states  
39 (Borrageiro et al., 2018; Dickson, 2021; Kori and Yalcin Arga, 2018; Pedrotty et al., 2012), cellular  
40 differentiation and tissue-specific functions (Burke et al., 2020; Uhlen et al., 2016; Watcham et  
41 al., 2019), and cellular responses to environmental perturbations (Kochanowski et al., 2017).  
42 Although many tools improve the coverage of gene expression data analysis, to gain more  
43 functional insights into the modulation of cell state (Nguyen et al., 2019), quantitative assessments  
44 using genome-scale models (GEMs) can provide rich mechanistic insights.

45 GEMs are a comprehensive repository of biochemical reactions encoded within the genome of an  
46 organism (Gu et al., 2019) that reflect its metabolic capabilities. The sheer size (e.g., number of  
47 reactions) of eukaryotic genome-scale models introduces computational and data availability  
48 bottlenecks to parameterize quantitative integration techniques such as whole-cell modeling  
49 (Macklin et al., 2020), ME-Models (O'Brien et al., 2013), or kinetic models (Gopalakrishnan et  
50 al., 2020; Khodayari and Maranas, 2016). The integration of transcriptomics with GEMs has been  
51 invaluable to the scientific community for nearly two decades (Blazier and Papin, 2012; Robaina  
52 Estevez and Nikoloski, 2014). For example, transcriptomics data can be integrated with eukaryotic  
53 models through binarization of enzyme abundance levels to “ON” or “OFF” states after  
54 thresholding associated gene expression levels and evaluating gene-protein-reaction (GPR)  
55 relationships to yield context-specific models that represent the condition-specific metabolism of  
56 the organism. However, inactivating reactions based on thresholding alone leads to fragmented  
57 metabolic networks that are incapable of predicting any meaningful flux distributions (hereafter  
58 known as flux inconsistent networks) (Åkesson et al., 2004). Flux consistency must be restored

59 using gap-filling algorithms, which seek to preserve the validity of the model. Several algorithms  
60 have been developed over the past decade, each with its own unique approach for extracting flux-  
61 consistent sub-networks. Context-specific models generated using various model extraction  
62 methods have been previously applied to study human tissue-specific metabolism (Jerby et al.,  
63 2010), identify biomarkers in NAFLD (Mardinoglu et al., 2014), cancer (Zielinski et al., 2017),  
64 and diabetes (Bordbar et al., 2011; Kumar et al., 2014), propose potential anti-cancer drug targets  
65 (Pacheco et al., 2019), and optimize bioprocessing for drug manufacturing (Fouladiha et al., 2020;  
66 Schinn et al., 2021a).

67 Model extraction methods are broadly classified into optimization-based and pruning-based  
68 methods. Optimization-based methods are broadly classified into the GIMME-like family of  
69 methods (Becker and Palsson, 2008) and the iMAT-like family of methods (including iMAT (Zur  
70 et al., 2010), INIT (Agren et al., 2012), and tINIT (Agren et al., 2014)) and rely on solving a linear  
71 or mixed-integer programming problem to extract context-specific models. The objective varies  
72 based on the method and generally maximizes removal of poorly expressed genes (as in the  
73 GIMME-like methods) or inclusion of highly expressed genes (as in iMAT and INIT) and may  
74 enforce minimum flux through certain required phenotype-defining pathways (also known as  
75 required metabolic functions (RMFs)) as implemented in tINIT. On the other hand, pruning-based  
76 methods like MBA (Jerby et al., 2010), FASTCORE (Vlassis et al., 2014), mCADRE (Wang et  
77 al., 2012), and CORDA (Schultz and Qutub, 2016) extract context-specific models by first  
78 identifying a candidate list of reactions to be removed and then pruning the genome-scale models  
79 one reaction at a time, until no more reactions can be removed without losing information about  
80 the cell's phenotype. While optimization-based methods are faster and better at protecting flux  
81 through known metabolic functions, pruning-based methods allow evidence-based retention of

82 reactions, thereby generating models that are more representative of the physiological state being  
83 investigated (Robaina Estevez and Nikoloski, 2014).

84 The content and quality of an extracted model depends on the choice of model extraction method,  
85 the threshold applied to gene expression data to identify active and inactive reactions, and the  
86 coverage of data. Previous studies (Opdam et al., 2017; Richelle et al., 2019b) revealed the choice  
87 of method and the threshold strongly influencing model content. However, an overlooked factor  
88 influencing model content is whether model extraction methods yield a unique context-specific  
89 model. Alternate optimal solutions arise when there are multiple combinations of reactions  
90 associated with poorly expressed genes that can be retained to restore flux consistency of the  
91 metabolic network but cannot be effectively resolved using the available gene expression data.  
92 Typically, these include isozymes utilizing different cofactors (e.g., NAD vs NADP) and alternate  
93 biosynthetic routes. The scope and disparity of alternate optimal solutions is a measure of  
94 reproducibility of each model extraction algorithm and sufficiency of data. To account for alternate  
95 optimal solutions, the algorithm EXAMO first identifies all fluxes that are active in all alternate  
96 solutions generated by iMAT and uses this set of reactions as high-confidence reactions in MBA  
97 (Rossell et al., 2013). Robaina-Estevez and Nikoloski (2017) developed a framework to quantify  
98 alternate optima in flux-centric extraction methods such as RegrEx and CORDA and revealed that  
99 the variability in extracted model topology stemmed from different combinations of 58% of the  
100 reactions that were flagged for removal. Therefore, it is necessary to identify and quantify the  
101 variability in extracted context-specific models and screen potential alternate solutions using  
102 appropriate data (gene knockout data, fluxomics, endo-metabolomics, etc.) so that extracted  
103 models are sufficiently accurate to identify meaningful intervention strategies for therapeutic  
104 design or metabolic engineering applications of interest. In addition, a framework to enumerate

105 and screen the space of alternate solutions will provide insights into the reproducibility of existing  
106 model extraction algorithms and establish a platform to benchmark future omics-integration  
107 algorithms.

108 This study comprehensively assesses the importance of quantitatively protecting flux through  
109 RMF reactions (the biomass production reaction, in this case) and the effect of choice of threshold  
110 and extraction method on the scope of alternate optimal solutions during transcriptomics-based  
111 model extraction in *E. coli*, CHO-S, and a renal cancer cell line (786O). Ensembles of 100 context-  
112 specific models were extracted using combinations of parameters selected from five thresholding  
113 approaches (global 80<sup>th</sup> percentile, global 75<sup>th</sup> percentile, global 60<sup>th</sup> percentile, StanDep, and local  
114 T2), four model extraction methods (GIMME, iMAT, MBA, and mCADRE), and quantitative  
115 protection of metabolic functions (i.e., growth rate). First, we define a method to generate the  
116 ensemble of alternate solutions for each case. Next, we evaluate the growth rate predicted by all  
117 extracted context-specific models and determine that qualitatively protecting the biomass reaction  
118 (as previously suggested (Richelle et al., 2019a)) is not sufficient to accurately predict the  
119 experimentally measured growth rate. Following this, we quantify the variability in content of  
120 context-specific models in each ensemble in terms of conserved and variable pathways to assess  
121 the reproducibility of each method. Across all organisms and expression thresholds evaluated in  
122 this study, mCADRE generated the most reproducible models, whereas models generated by MBA  
123 showed the largest variance in reaction content. We also find that the size and content of models  
124 extracted using GIMME were the least sensitive to the applied expression threshold in all  
125 organisms evaluated in this study. We then demonstrate the utility of the receiver-operating-  
126 characteristic (ROC) plot in visualizing the performance of extracted context-specific models and  
127 propose a metric to select the model which best represents the biological system in the context of

128 the application, using gene knockout data reserved from the model extraction dataset. Using a  
129 Euclidean distance metric, we quantified the proximity of the extracted models to the ideal model  
130 and found that GIMME generated the best-performing models for fast growing prokaryotes such  
131 as *E. coli*, whereas models extracted using mCADRE fared better in mammalian systems such as  
132 786O. Finally, we establish a set of guidelines that an extracted model should satisfy for reliable  
133 hypothesis generation in biomedical and metabolic engineering applications.

134

135

## 136 **2. RESULTS**

### 137 **2.1. Flux through required metabolic functions must be explicitly protected during model** 138 **extraction**

139 Model extraction methods aim to generate models that predict biologically relevant fluxes and  
140 accurately capture the sensitivity of the fluxome to genetic and environmental perturbations.  
141 Therefore, biologically relevant models must accurately recapitulate experimentally measured  
142 metabolite uptake and secretion rates and fluxes through required metabolic function (RMF)  
143 reactions. In this study, we consider the biomass formation reaction as an RMF reaction. Because  
144 the biomass reaction may not necessarily be retained in the extracted models, it should be protected  
145 as a core reaction to ensure retention (Richelle et al., 2019a). This was sufficient in optimization-  
146 based methods (GIMME and iMAT), in which fluxes were protected using lower and upper bounds  
147 in the metabolic model. However, protecting the biomass reaction was insufficient to ensure a  
148 biologically relevant growth rate in models extracted using MBA and mCADRE (Figure 1). Only  
149 34 MBA models for *E. coli* generated using the 80<sup>th</sup> percentile expression threshold predicted a

150 growth rate greater than 90% of the experimentally measured growth rate (Supplementary Figure  
151 S1A). For 786O, only 36 of 500 models generated using MBA supported a growth rate within 10%  
152 of the maximum rate predicted by Recon2.2 (Supplementary Figure S1B). For CHO-S, only 9 of  
153 500 generated MBA models predicted a growth rate within 10% of the maximum growth rate  
154 predicted by *iCHO1766* (Supplementary Figure S1C). No model extracted using mCADRE for  
155 any organism correctly predicted biologically relevant growth rates despite protecting the biomass  
156 formation reaction itself as a core reaction. Core reactions in MBA and mCADRE are considered  
157 active if they can carry a flux of at least  $10^{-4}$  mmol/gDW-h for *E. coli* or  $10^{-4}$  mmol/gDW-day for  
158 786O and CHO-S, which is several orders of magnitude less than the experimentally measured  
159 growth rate of all three organisms.

160 In *E. coli*, reactions from the electron transport chain (complexes I, II and III) and succinate  
161 dehydrogenase from the TCA cycle were necessary for ATP production but were inactivated  
162 because the associated transcript abundances were below the cutoff threshold. The resulting  
163 models therefore relied on the lower-yield substrate-level phosphorylation reactions for ATP  
164 generation and yielded lower growth rates compared to *iJO1366*. In 786O and CHO-S, reactions  
165 supporting cysteine and lysine uptake were removed based on transcriptomic evidence. Thus, the  
166 resulting models relied on *de novo* cysteine biosynthesis pathways and biocytin catabolism to meet  
167 the biosynthetic cysteine and lysine demands. The low abundance of biocytin in cell culture media  
168 limited lysine availability for protein synthesis, resulting in a considerably lower growth rate  
169 prediction compared to the respective parent genome-scale models. Ranking of non-core reactions  
170 based on expression scores prior to model pruning in mCADRE ensured that reactions required to  
171 sustain an experimentally measured growth rate were always removed due to low or missing gene  
172 expression values. However, very few MBA models fortuitously retained these reactions because



173 MBA randomizes the removal order for reactions with low expression scores. Upon enforcing a  
174 mandatory minimum flux of 90% of the maximum growth rate predicted by the parent genome-  
175 scale model as a pruning criterion, all models generated by MBA and mCADRE predicted a  
176 biologically relevant growth rate for each of *E. coli*, 786O, and CHO-S (Figure 1). These findings  
177 suggest that even the most lenient threshold approaches such as StanDep and the Local T2  
178 threshold can filter out reactions necessary to support key phenotypes and therefore, flux through  
179 RMF reactions must be explicitly protected during model extraction.

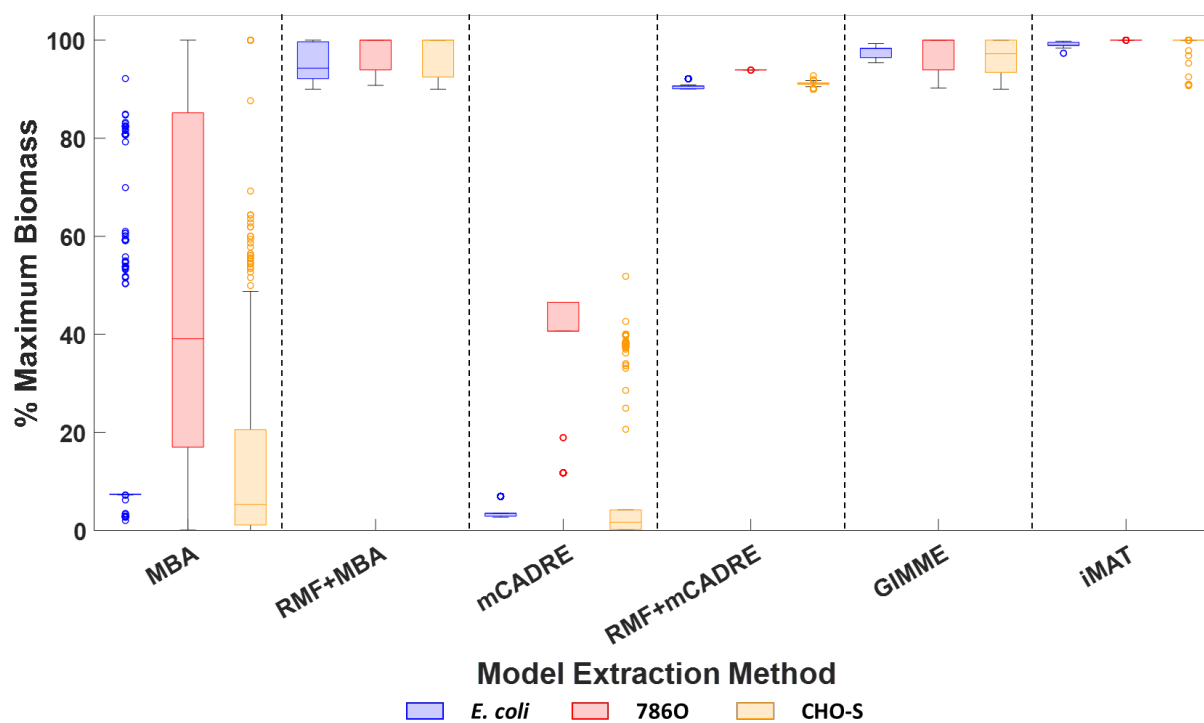

180  
181 **Figure 1:** Retention of required metabolic functions. Box and Whisker plots show the distribution of the  
182 maximum growth rate predicted by extracted models relative to the maximum growth rate predicted by the  
183 genome-scale model for *E. coli*, 786O, and CHO-S using GIMME, iMAT, MBA, and mCADRE.

184  
185 **2.2. Choice of extraction method determines the scope of alternate solutions**

186 Analysis of model sizes in each ensemble provided insights into the reproducibility and internal  
187 variability of model extraction methods. The ensemble generated using mCADRE showed the

188 least dispersion in model sizes (average range = 2 for *E. coli*, 10 for 786O, and 14 for CHO-S),  
189 while models generated using MBA showed the largest dispersion in model sizes for *E. coli*  
190 (average range = 37) and CHO-S (average range = 280) (Figure 2, Supplementary Tables ST4,  
191 ST5, and ST6). For 786O, models generated using iMAT showed the largest size dispersion  
192 (average range = 128). Upon increasing the global expression threshold from the 60<sup>th</sup> percentile to  
193 the 80<sup>th</sup> percentile, the dispersion of model sizes from iMAT and MBA increased by up to 50%.  
194 However, ensembles generated using iMAT and MBA with StanDep or local T2 thresholding had  
195 lower size dispersion compared to models using global thresholding. The size dispersion correlated  
196 with the size of the core reaction set. For larger core reaction sets, model extraction methods choose  
197 pathways from a smaller set of non-core reactions for gap-filling, resulting in ensembles with  
198 smaller dispersions for thresholds with more core reactions. Interestingly, model size dispersion  
199 in ensembles generated using GIMME remained relatively unchanged in response to changes in  
200 threshold. On the other hand, rank-ordering of non-core reactions by mCADRE limits variability  
201 in removal order, and therefore, generated ensembles with the smallest size dispersion.

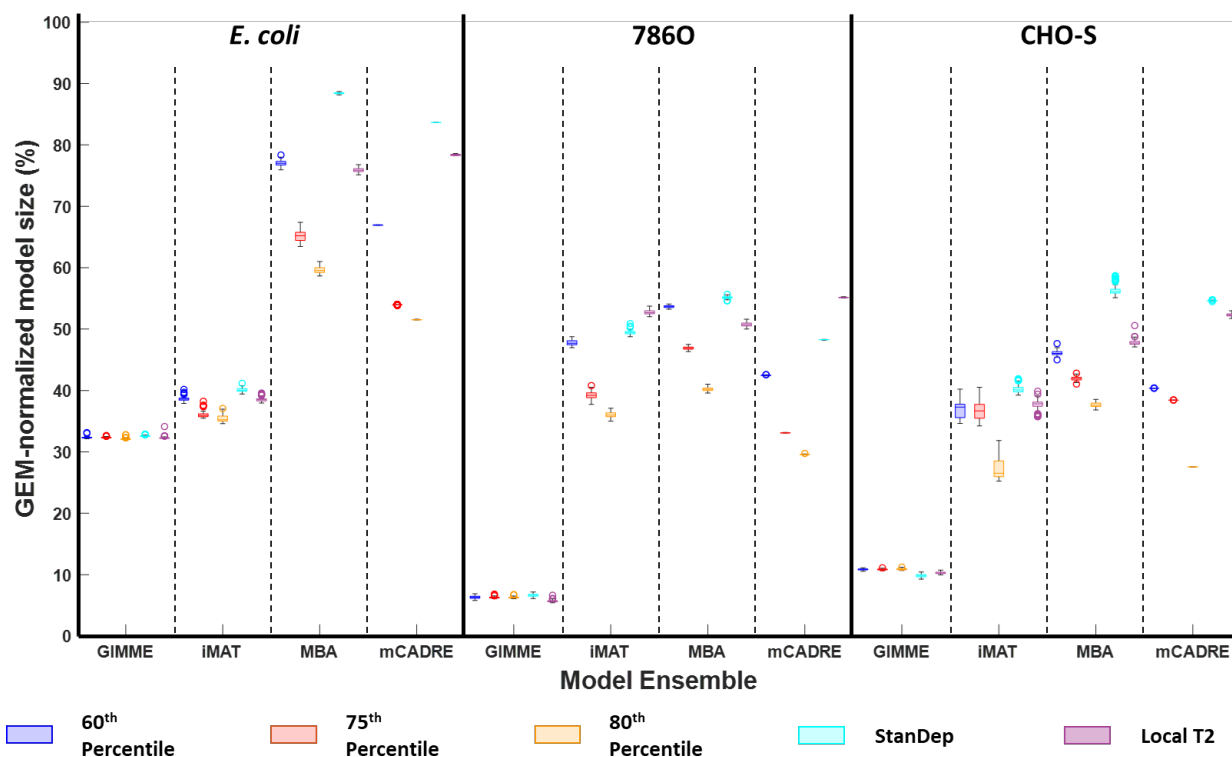

207 **Figure 2:** Size distribution of models in the ensemble generated using GIMME, iMAT, MBA, and  
208 mCADRE for *E. coli*, 786O and CHO-S with the global 60<sup>th</sup> percentile threshold, global 75<sup>th</sup> percentile  
209 threshold, global 80<sup>th</sup> percentile threshold, StanDep, and the local T2 threshold.

210 Because a low size dispersion within an ensemble does not necessarily imply fewer alternate  
211 solutions, conserved and variable reactions in the ensemble must be identified and analyzed.  
212 During model extraction, we classified all reactions in the parent genome-scale models into one of  
213 four classes: conserved reactions (always retained in the ensemble), inactivated reactions (always  
214 removed in all models), variable reactions (retained in some models when certain criteria are met),  
and no data reaction (reactions lacking data in favor of retention or removal). The Jaccard index  
highlights the prevalence of each of these reaction classes and therefore quantifies the diversity of  
models within an ensemble.

215 The average Jaccard index for ensembles from mCADRE were 0.99, 0.99, and 0.98, in *E. coli*,  
216 786O, and CHO-S, respectively. Over 98% of reactions in the extracted models were conserved  
217 reactions (Figure 3A). Upon varying the applied threshold, the number of conserved reactions in  
218 *E. coli* ranged from 872 to 1,426 reactions. The corresponding ranges were 1,722 to 3,199 reactions  
219 in 786O, and 1,161 to 2,249 reactions in CHO-S. Reactions were conserved in an ensemble  
220 because they were either core reactions, stoichiometrically coupled to core reactions, or  
221 stoichiometrically coupled to the biomass formation reaction. 434, 286, and 332 growth-coupled  
222 reactions were conserved in *E. coli*, 786O, and CHO-S, respectively. While only 315 reactions in  
223 *E. coli* were retained to activate blocked core reactions, this number increased up to 541 reactions  
224 in CHO-S and 1,019 reactions in 786O. This suggests that reaction retention in *E. coli* was  
225 primarily driven by biomass coupling, whereas gene expression data were the primary cause of  
226 reaction retention in the eukaryotic models. 27 reactions in *E. coli*, 303 reactions in 786O, and 259  
227 reactions in CHO-S constituted alternate solutions (Figure 3B). In *E. coli*, these 27 reactions (21  
228 reactions from glycerophospholipid metabolism, 3 metabolite transport reactions, and 3 reactions  
229 from lipopolysaccharide biosynthesis) were included to ensure flux consistency of seven core  
230 reactions (five transport reactions, and one reaction each from lipopolysaccharide and  
231 glycerophospholipid biosynthesis). In 786O, alternate solutions resulted from variability in 203  
232 transport reactions, 34 glycosylation reactions, 22 reactions from fatty acid metabolism, and 8  
233 reactions from nucleotide metabolism, 10 reactions from amino acid metabolism, and 23 reactions  
234 from central metabolism. These reactions were retained in the extracted models to activate 195  
235 core reactions, primarily from fatty acid metabolism, all of which have four alternate pathways on  
236 average activating them. In CHO-S, 187 transport reactions, 25 reactions from fatty acid  
237 metabolism, 15 glycosylation reactions, 11 reactions from nucleotide metabolism, and 21 reactions

238 from central and amino acid metabolism make up all identified alternate solutions. Similar to  
239 786O, the core reactions activated by these non-conserved reactions are predominantly from fatty  
240 acid metabolism. Since mCADRE attempts to remove all non-core reactions, none of the reactions  
241 in the model were classified as no data reactions.

242 Compared to mCADRE, MBA ensembles had greater size dispersion and lower Jaccard index  
243 values (averaging 0.95 in *E. coli*, 0.86 in 786O, and 0.82 in CHO-S). Although MBA used more  
244 core reactions than mCADRE, an average 10% reduction in conserved reactions was observed in  
245 all three organisms. Unlike mCADRE, MBA permits removing core reactions if at least twice as  
246 many non-core reactions are removed. In addition, conserved reactions accounted for only 91%,  
247 84%, and 83% of the extracted models for *E. coli*, 786O, and CHO-S, respectively. This contrasted  
248 with mCADRE, in which >99% of the reactions in all extracted models were conserved. The  
249 variable fraction of the models was considerably higher in MBA models compared to mCADRE  
250 models (Figure 4A), accounting for 247 reactions in *E. coli*, 1,436 reactions in 786O, and 1,579 in  
251 CHO-S, of which, 23 reactions in *E. coli*, 49 reactions in 786O, and 91 reactions in CHO-S were  
252 rendered growth-coupled by mCADRE. The variable reactions in extracted models were  
253 predominantly from fatty acid metabolism in *E. coli* and from metabolite transport pathways in  
254 786O and CHO-S (Figure 3B). Of these variable reactions, 171 reactions in *E. coli*, 1,114 reactions  
255 in 786O, and 1,222 reactions in CHO-S were always removed in ensembles generated using  
256 mCADRE. This is because MBA randomizes the removal order of non-core reactions whereas  
257 mCADRE sorts non-core reactions based on expression and connectivity evidence prior to  
258 removal. Thus, certain non-core reactions are always eliminated by mCADRE because their low  
259 gene expression increases their removal priority, while MBA may retain them if competing non-

260 core reactions are removed earlier. This implementation difference contributed to the larger  
261 variation in size and content in models extracted using MBA compared to other methods.

262 Compared to MBA, iMAT models had fewer reactions, lower dispersion, and lower variability in  
263 model content with a Jaccard index of 0.96, 0.86, and 0.8 in *E. coli*, 786O, and CHO-S,  
264 respectively. Ensembles generated using iMAT for *E. coli* had the smallest fraction of conserved  
265 reactions (88%). For 786O and CHO-S, this fraction was 74% and 55%, respectively, considerably  
266 lower than mCADRE despite having the same number of core reactions. Unlike mCADRE, iMAT  
267 does not remove all reactions below the high expression threshold but attempts to inactivate only  
268 those reactions whose expression score is below the specified lower threshold. Moreover, iMAT  
269 permits removing core reactions if an equal number of low expression reactions were inactivated.  
270 Reactions from transport pathways and fatty acid metabolism accounted for 65% of all variable  
271 reactions in the *E. coli* ensembles (Figure 4B). Meanwhile, reactions from fatty acid metabolism,  
272 cofactor biosynthesis, and transport pathways accounted for 88% of the variable reactions in 786O,  
273 whereas reactions from metabolite transport pathways alone accounted for 70% of the variable  
274 reactions in CHO-S.

275 Although the GIMME ensembles had low size dispersions relative to iMAT and MBA, a pairwise  
276 comparison of models based on reaction content revealed that the scope of alternate solutions  
277 varied based on the topological features of the parent GSM model. Ensembles extracted using  
278 GIMME for *E. coli* had an average Jaccard index of 0.99 with 426 conserved reactions across the  
279 ensemble, 1,815 reactions always removed in all models, and 342 reactions contributing to  
280 alternate solutions. Of the 426 conserved reactions, 375 reactions were growth-coupled in  
281 *iJO1366*, 43 reactions were growth-coupled in the extracted models but not in *iJO1366*, one  
282 reaction (ATP maintenance) was retained based on pre-specified flux bounds, and six reactions

283 from central metabolism were retained as alternatives to low-expression reactions. Of the 342  
284 variable reactions, 224 reactions from metabolite transport, fatty acid metabolism, tryptophan  
285 biosynthesis and nucleotide phosphorylation pathways were growth-coupled when retained in the  
286 extracted models. Ensembles for both eukaryotic models had more diverse alternate solutions with  
287 an average Jaccard index of 0.72 for CHO-S and 0.64 for 786O. The number of conserved reactions  
288 was also reduced to 170 reactions in CHO-S and 83 reactions in 786O with only 127 and 44  
289 reactions coupled to biomass formation in iCHO1766 and Recon2.2, respectively. 4,757 reactions  
290 in CHO-S and 5,861 reactions in 786O were inactivated in every extracted model. However, the  
291 number of variable reactions in each case increased to 1,736 reactions in CHO-S and 1,841  
292 reactions in 786O, which is much greater than *E. coli*, despite similarities in model sizes in all  
293 three ensembles. 70% of these variable reactions were inter-compartment metabolite transport  
294 reactions, 10% from amino acid metabolism, 6% from fatty acid metabolism, and the remaining  
295 from cofactor biosynthesis and nucleotide biosynthesis and salvage. The primary objective of  
296 GIMME is to inactivate reactions with genes expressed below the threshold while ensuring that  
297 RMF reactions are retained and fully operational. Thus, we classify reactions as: (i) growth-  
298 coupled, (ii) low-expression, and (iii) maybe-on. All growth-coupled reactions are always retained  
299 in every extracted model. Low-expression reactions are always removed unless coupled to the  
300 RMF reaction. The inactivation of low-expression reactions forces flux through alternate  
301 pathways, when available, to meet the demands of the RMF reaction. Pathways that are the sole  
302 alternatives to low-expression reactions are retained in every extracted model. However, when  
303 alternate pathways exist, variable reactions can be retained, resulting in alternate solutions.  
304 Reactions with no available data have no reason for retention or removal and therefore contribute  
305 to alternate pathways. As such, alternate solutions from GIMME are determined predominantly by

306 the topological features of the parent GSM. In *E. coli*, a much larger fraction of metabolism is  
 307 growth-coupled leading to less diverse alternate solutions. However, models relying on more  
 308 complex media, such as 786O and CHO-S have a more diverse set of alternate solutions.

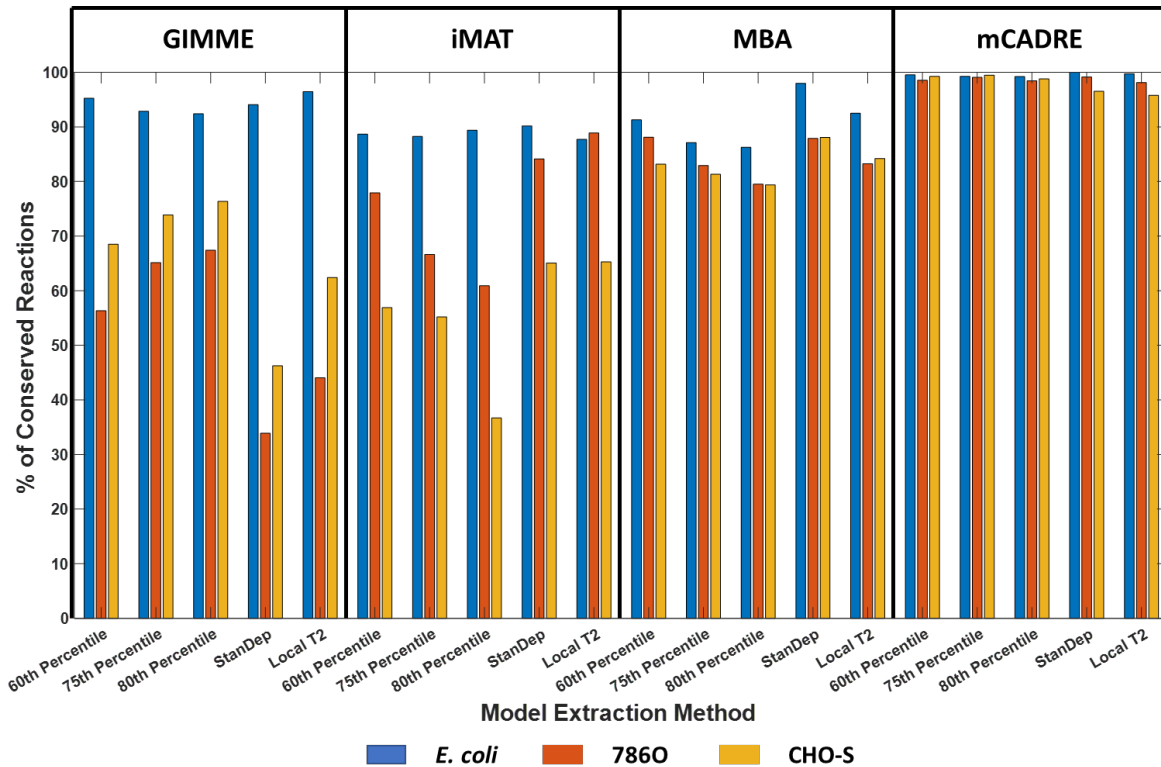

309

310 **Figure 3A:** Fraction of conserved reactions in models extracted using GIMME, iMAT, MBA, and  
 311 mCADRE for *E. coli*, 786O, and CHO-S with various thresholds.

312



313

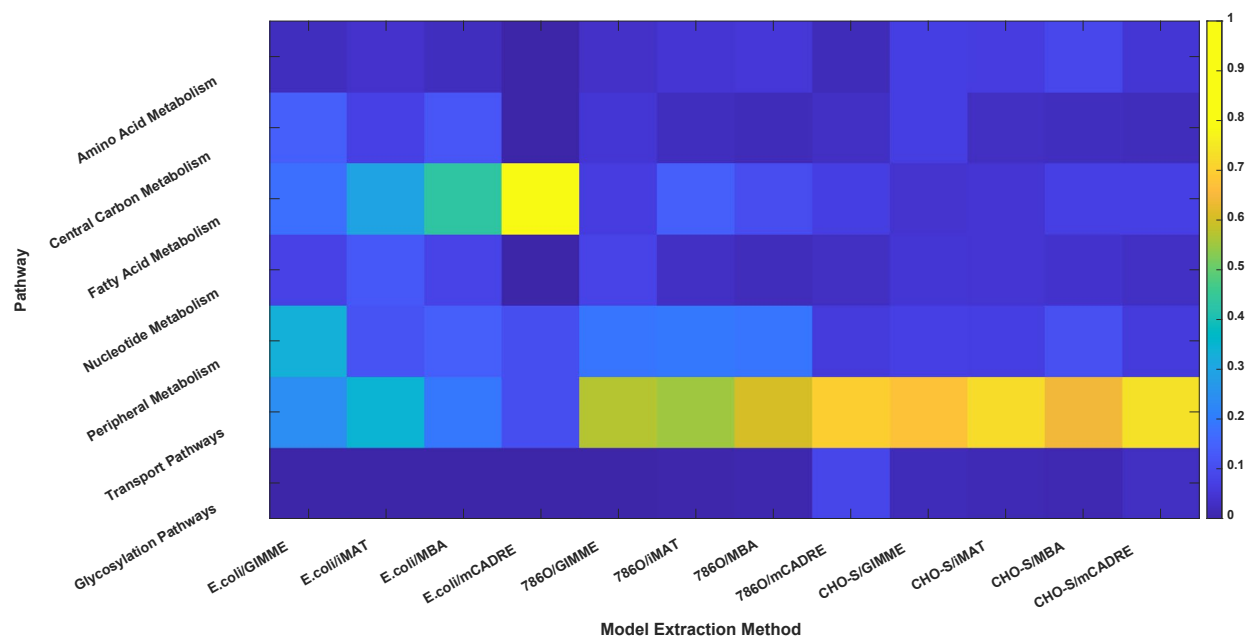

314

315 **Figure 3B:** Fraction of reactions from various pathways (0 representing no variable reactions and  
316 1 representing all variable reactions) contributing to alternate solutions in models extracted using  
317 GIMME, iMAT, MBA, and mCADRE for *E. coli*, 786O, and CHO-S with various thresholds

318

319

### 320 2.3. ROC plots help evaluate the quality of extracted models

321 Diverse ensembles of context-specific models can be generated, but it is often unclear which  
322 models are most biologically relevant. To validate extracted models, gene dispensability data, flux  
323 redirections, and fluxomics datasets can be used (Opdam et al., 2017). Here we rely on gene  
324 knockout data to evaluate the quality of alternate optimal models. The ideal model would correctly  
325 identify all essential and non-essential genes. Integrating transcriptomics data deactivates  
326 pathways that are inactive in the context of interest and is therefore expected to reconcile false  
327 predictions by the genome-scale model. Here we evaluate the specificity and sensitivity using  
328 receiver operating characteristic (ROC) plots (see Methods section for the definition of specificity  
329 and sensitivity and Supplementary Figure S2 ROC plots for *E. coli*, 786O, and CHO-S). After

330 computing the specificity and sensitivity for each model, the distance from the ideal model was  
331 computed and then compared with the parent genome-scale model.

332 All extracted models outperformed their respective parent GEM models in predicting gene  
333 dispensability. This is because model pruning removes alternate routes that compensate for the  
334 loss of function of essential reactions, which reconciles false-positive predictions in the genome-  
335 scale model. We find that GIMME models had the highest specificity for *E. coli* and CHO-S with  
336 an average sensitivity of 0.87 and 0.71, respectively. mCADRE generated the highest specificity  
337 models for 786O with an average specificity of 0.14. The best models generated for *E. coli* and  
338 CHO-S using GIMME showed a 29% and 55% improvement in gene essentiality predictions  
339 compared to *iJO1366* and *iCHO1766*, respectively. On the other hand, the best model for 786O  
340 generated using mCADRE only showed a 13% improvement compared to Recon2.2.

341 The essentiality of 203 genes were reconciled in the best performing model generated using  
342 GIMME for *E. coli*, including 30 genes from fatty acid biosynthesis, nucleotide biosynthesis, and  
343 glycolysis. Compared to other models in the ensemble, the best performing model failed to  
344 reconcile the essentiality of the b1638 gene that encodes the PDX5POi reaction involved in  
345 pyridoxal phosphate biosynthesis. The PDX5PO2 reactions serves as an alternate route to  
346 pyridoxal phosphate synthesis when the PDX5POi gene is inactivated. Because PDX5PO2 is not  
347 associated with any gene, it is not preferentially removed or retained in models generated using  
348 GIMME and iMAT, due to which, b1638 is always reconciled in these ensembles. In contrast,  
349 PDX5PO2 is treated as a low confidence reaction by MBA and mCADRE, leading to prioritized  
350 removal. As a result of this, MBA and mCADRE can reconcile the essentiality of b1638.

351 The essentiality of 62 genes predominantly from fatty acid metabolism and transport pathways  
352 were reconciled in the best performing model for 786O generated using mCADRE. In the best

353 model for CHO-S constructed using GIMME, the essentiality of 18 genes from fatty acid  
354 metabolism and the TCA cycle were reconciled. The best models generated for 786O and CHO-S  
355 reconciled all essential genes reconciled in their respective ensembles.

356 The difference in gene essentiality reconciliation between the three models is attributable to  
357 differences in the metabolism of *E. coli* and mammalian cells, which are reflected in the topological  
358 features of *iJO1366*, *Recon2.2*, and *iCHO1766*. Because *E. coli* grows in minimal media, a large  
359 fraction of its metabolism is biosynthetic, leading to a higher number of growth-coupled pathways.  
360 Protection of flux through the biomass reaction leads to removal of only dispensable pathways  
361 supported by low gene expression in models extracted using GIMME. This gave rise to models  
362 with the largest increase in specificity compared to the parent genome-scale model in *E. coli*. On  
363 the other hand, because a much smaller fraction of *Recon2.2* and *iCHO1766* is coupled to biomass  
364 production, removal of reactions without evidence-based prioritization leads to erroneous removal  
365 of essential reactions. This resulted in models with low specificity in 786O and CHO-S. In contrast,  
366 mCADRE prioritizes removal of reactions that are poorly expressed and weakly connected to  
367 highly expressed reactions. This systematic removal protects against the removal of highly  
368 expressed reactions in potentially essential pathways, thereby generating models with higher  
369 specificity than those extracted using GIMME for 786O. In comparison, models generated by  
370 iMAT and MBA did not perform as well as those generated by GIMME as suggested by their  
371 proximity to the parent genome-scale model (Figure 4 and Supplementary Figure S2). Models  
372 generated by iMAT were much closer to the parent genome-scale model for *E. coli* and 786O, but  
373 performed considerably better in CHO-S.

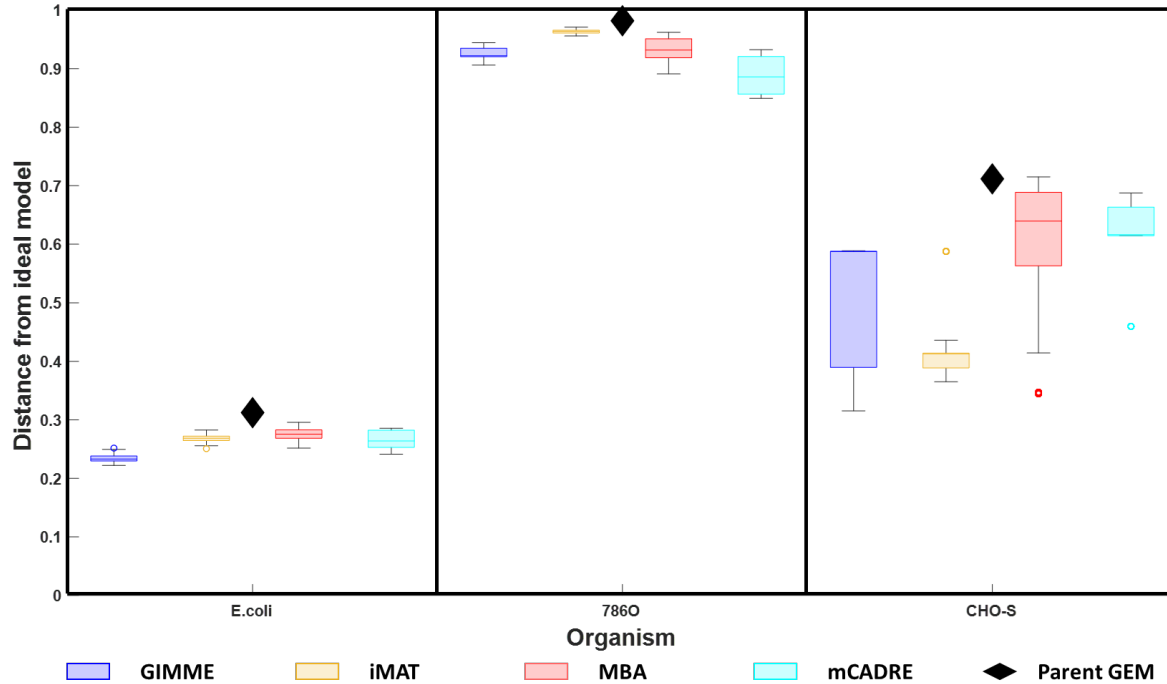

374

375 **Figure 4A:** Improvement in quality of models extracted using GIMME, iMAT, MBA, and  
376 mCADRE for *E. coli*, 786O, and CHO-S compared to the parent genome-scale models. The ideal  
377 model correctly classifies all essential and non-essential reactions and therefore, has a specificity  
378 and sensitivity equal to 1. The distance from the ideal model is calculated as

379  $\sqrt{(1 - \text{sensitivity})^2 + (1 - \text{specificity})^2}$ .

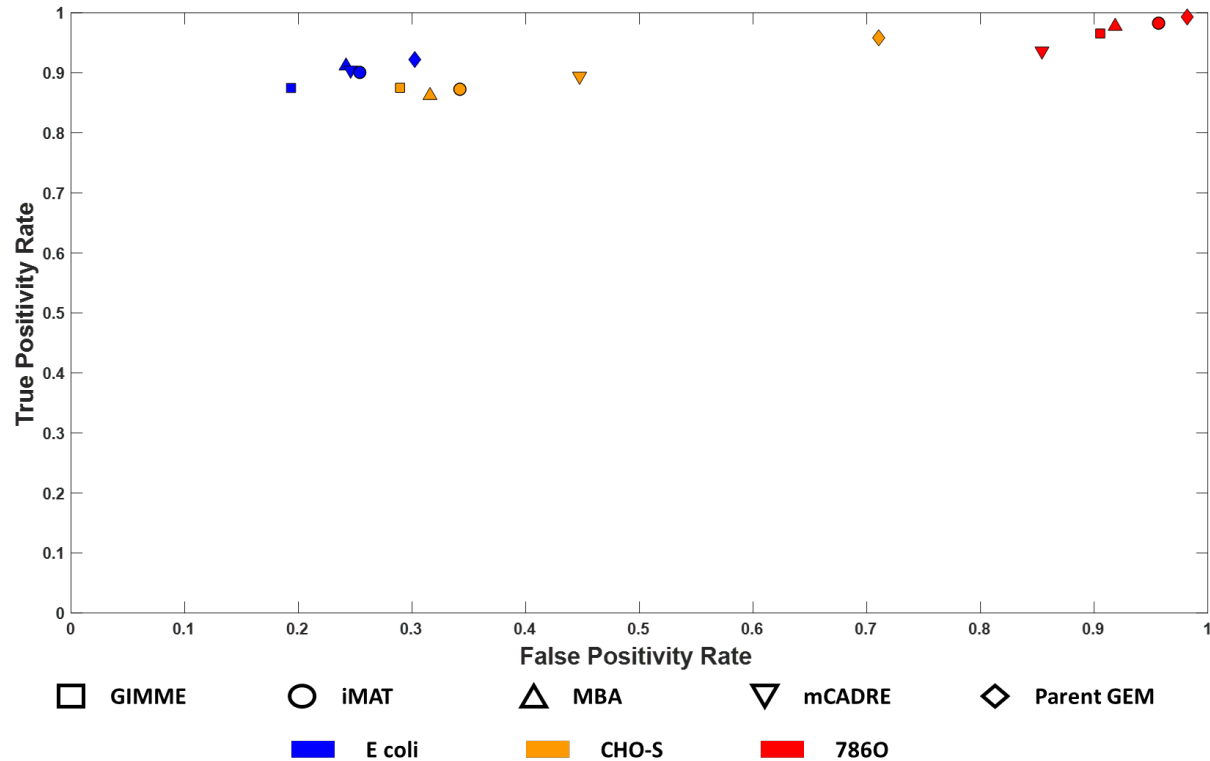

380

381 **Figure 4B:** Receiver Operating Characteristic (ROC) plot showing the improvement in model  
382 performance of the best models extracted using GIMME, iMAT, MBA, and mCADRE relative to  
383 the parent genome-scale model in *E. coli*, 786O, and CHO-S.

384

### 385 3. DISCUSSION

386 This study evaluates key parameters influencing the quality of context-specific models extracted  
387 with various methods using gene expression data. While the choice of model extraction method  
388 and the threshold for gene expression remain the most important factors affecting model size, our  
389 analysis reveals that depending on the choice of model extraction method, the exploration of  
390 alternate solutions can lead to drastically different models. These findings suggest the need for a  
391 set of guidelines for extracting the most meaningful and biologically relevant context-specific  
392 models, to supplement guidelines on model construction (Thiele and Palsson, 2010), model  
393 annotation (Ebrahim et al., 2015), and model parameterization (Schinn et al., 2021b). Key  
394 guidelines are presented in Table 1, a workflow incorporating the proposed guidelines is shown in

395 Figure 5, and the steps to implement the workflow are listed in Table 2. Three steps (Figure 5) are  
396 involved in the extraction of context-specific models from genome-scale models: (i) pre-  
397 processing, (ii) ensemble generation, and (iii) ensemble screening. The pre-processing step  
398 transforms the raw model and transcriptomic data into a format compatible with model extraction  
399 methods.

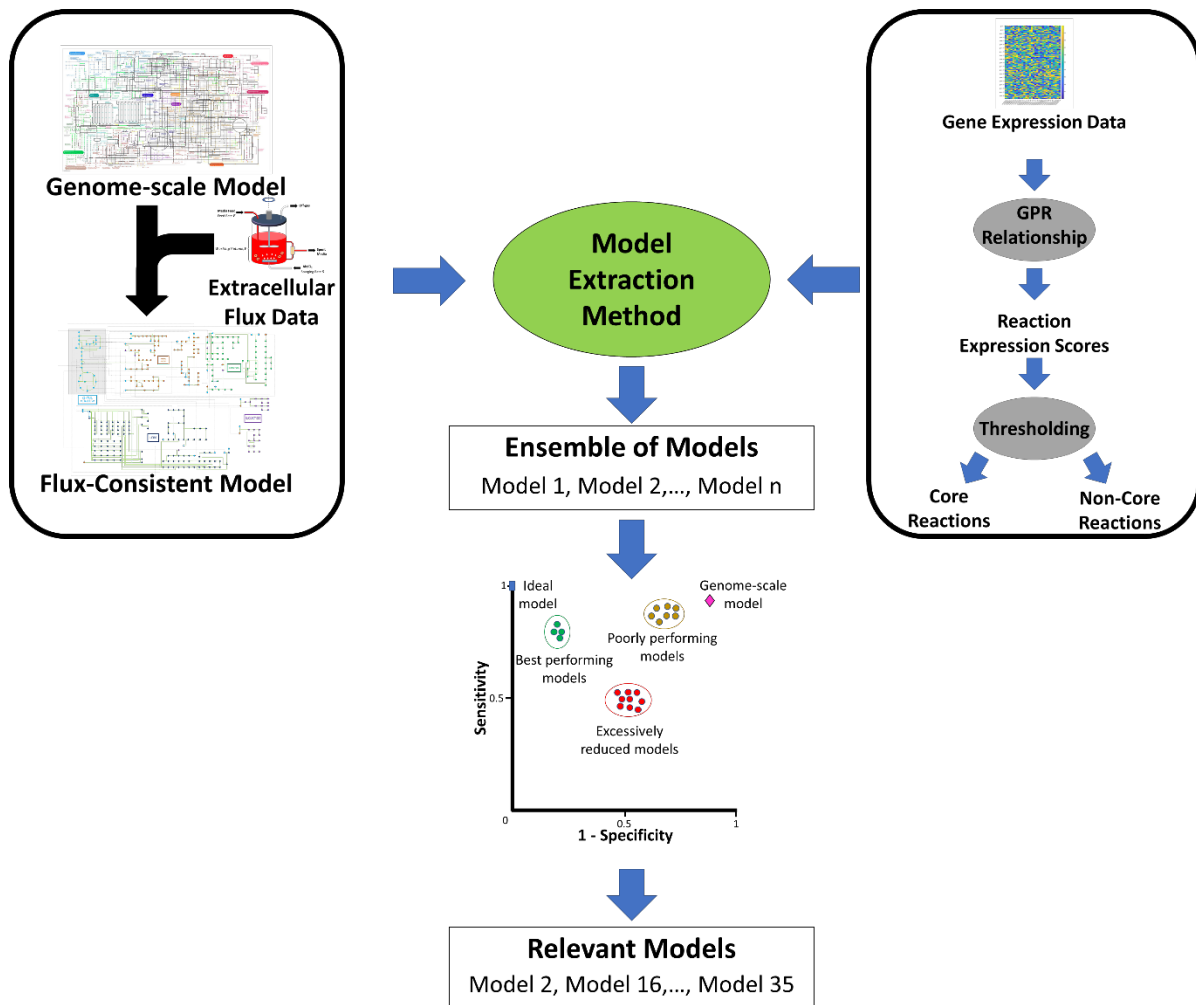

400

401 **Figure 5:** Generalized workflow pipeline for extracting context-specific models using gene-  
402 expression data

403 Preprocessing of transcriptomics involves applying a threshold to determine which reactions are  
404 likely active. To this end, transcriptomic data are log-transformed and mapped to reactions via

405 gene-protein-reaction (GPR) relationships. A threshold (top 25<sup>th</sup> percentile, top 50<sup>th</sup> percentile,  
406 etc.) is applied to reaction expression scores to extract lists of reactions based on the requirements  
407 of model extraction methods. Here we investigated combinations of five thresholds (global 60<sup>th</sup>  
408 percentile, global 75<sup>th</sup> percentile, global 80<sup>th</sup> percentile, StanDep, and local T2 threshold) and four  
409 model extraction methods (GIMME, iMAT, MBA, and mCADRE). GIMME and mCADRE  
410 require the lists of reactions with expression scores below and above the specified threshold,  
411 respectively. iMAT and MBA require two thresholds to classify reactions into highly expressed  
412 and weakly expressed sets. Incorporating media information identifies and eliminates inconsistent  
413 core reactions which protects the workflow from extraction failures (see Supplementary Results).  
414 After preprocessing, gap-filling of metabolic networks is performed using model extraction  
415 methods to ensure flux consistency of the core reaction set.

416

| # | <i>Guideline</i>                                                            |
|---|-----------------------------------------------------------------------------|
| 1 | Limit nutrient uptake to media components only                              |
| 2 | Enforce minimum fluxes through known metabolic functions                    |
| 3 | Generate and screen ensembles of alternate solutions using other omics data |
| 4 | Draw inferences from conserved reactions only                               |

417

418 **Table 1:** Guidelines for extracting meaningful metabolic models using transcriptomics data

419

| STEP            | DESCRIPTION                                                                                                                                                                                                                                                                                                                                                                                                                                                                      |
|-----------------|----------------------------------------------------------------------------------------------------------------------------------------------------------------------------------------------------------------------------------------------------------------------------------------------------------------------------------------------------------------------------------------------------------------------------------------------------------------------------------|
| <b>STEP 1A:</b> | <p style="text-align: center;"><b>Model preprocessing</b></p> <p>Impose the lower and upper bounds for the uptake and secretion of all measured metabolites as well as the growth rate. For metabolites in the growth medium that are not measured, an arbitrary bound limiting their uptake can be imposed. Identify all reactions incapable of carrying flux using Flux Variability Analysis and remove them. The resultant pre-processed model should be flux consistent.</p> |
| <b>STEP 1B:</b> | <p style="text-align: center;"><b>Data preprocessing</b></p> <p>Compute reaction expression scores from gene expression data using defined reaction-specific Gene-Protein-Reaction (GPR) rules. Generate multiple core reaction sets by applying different thresholds to the computed reaction expression scores. Local thresholding methods are often preferred due to their ability to retain lowly expressed housekeeping genes.</p>                                          |
| <b>STEP 2:</b>  | <p style="text-align: center;"><b>Identify metabolic tasks that define the cell's phenotype</b></p> <p>Generate a list of metabolic tasks that must be retained in extracted models. Metabolic tasks with available experimental measurements must be quantitatively protected. Other identified metabolic tasks should be added to the sets of core reactions.</p>                                                                                                              |
| <b>STEP 3:</b>  | <p style="text-align: center;"><b>Generate ensembles of context-specific models</b></p> <p>Using the preprocessed model from step 1a, the preprocessed reaction expression scores from step 1b, and the metabolic tasks from step 2 as inputs, generate ensembles of at least 50 models using any model extraction method.</p>                                                                                                                                                   |
| <b>STEP 4:</b>  | <p style="text-align: center;"><b>Screen and select the best-performing models</b></p> <p>For each model in the generated ensemble, compute the specificity and sensitivity using validation data (gene knockout, flux prediction, etc.). Compute the distance from the ideal model using the expression: <math>\sqrt{(1 - sensitivity)^2 + (1 - specificity)^2}</math>. The top performing models have the lowest distance metric.</p>                                          |



421 **Table 2:** Implementation of the workflow depicted in Figure 5.

422

423 During model extraction, it is mandatory to retain and protect the flux through known metabolic  
424 functions in the conditions being investigated. Indeed, required metabolic functions are not always  
425 retained in extracted models (Opdam et al., 2017) and protecting metabolic functions reduces the  
426 variability in model content between models extracted using different extraction methods (Richelle  
427 et al., 2019a). This study, however, finds that merely protecting these tasks is insufficient to ensure  
428 the required flux through the metabolic task. For example, the predicted growth rate in *E. coli*  
429 drops by over 99% in models generated using mCADRE when a minimum growth rate is not  
430 enforced. This suggests that while gene expression data provides insights into pathway activity, it  
431 alone is insufficient to distinguish between the various metabolic states underpinning the metabolic  
432 task. Although a comprehensive list of condition-specific metabolic tasks may be obtained through  
433 a literature search, sets of metabolic known tasks in rat and human tissues have been published  
434 (Blais et al., 2017; Richelle et al., 2019b; Thiele et al., 2013). Furthermore, context-specific  
435 metabolic tasks can be predicted from transcriptomic data to inform which of all tasks should be  
436 protected when extracting a model for the desired conditions or cell type (Masson et al., 2022;  
437 Richelle et al., 2019a; Richelle et al., 2021). The inability to consistently retain and predict a  
438 required flux through essential metabolic functions implies that flux constraints on these reactions  
439 complement gene expression data and improve the biological relevance of extracted models.

440 The size, content, and predictive capabilities of the model are strongly influenced by the choice of  
441 model extraction method and the applied threshold for gene expression, as seen in previous studies  
442 (Opdam et al., 2017; Richelle et al., 2019b). Therefore, the choice of the right combination of  
443 parameters is crucial for extracting a meaningful model. Here we demonstrated that ROC plots can

444 be used to identify the best performing models. While models generated using individual gene-  
445 specific local thresholds (Uhlen et al., 2015) or thresholds derived from hierarchical clustering  
446 (Joshi et al., 2020) were generally better, these thresholding methods can only be applied when  
447 multiple gene expression data samples are available. In addition to gene knockout data used for  
448 screening in this study, other types of biological data such as metabolomics and fluxomics data  
449 can be used for validation so long as the model's recapitulation of the validation dataset can be  
450 represented using a confusion matrix. While metabolomics data reveals which metabolites actively  
451 participate in the condition being investigated, fluxomics data elucidates pathway utilization to  
452 validate generated models. Furthermore, the quality of models extracted using different algorithms  
453 varied based on the biology of the organism in question. Using available gene knockout data, we  
454 found that GIMME generated the best performing models in fast-growing prokaryotes such as *E.*  
455 *coli*, whereas the corresponding models generated for a function-oriented cell such as 786O were  
456 sub-par. These differences suggest the need for a careful assessment of thresholds and methods  
457 while constructing context-specific models for targeted applications.

458 The impact of alternate solutions must be assessed while extracting and/or and developing tools to  
459 extract context-specific models. Alternate optima provide meaningful insights into the  
460 reproducibility of the algorithm and highlight the variable parts of the extracted metabolic  
461 networks (Rossell et al., 2013). This arises from the insufficiency of available gene expression  
462 data to resolve pathway usage in those parts of metabolism. Thus, any inferences drawn from flux  
463 distributions involving those pathways are potentially ambiguous and would require additional  
464 validation. Furthermore, for algorithms of lower reproducibility such as MBA, generation of an  
465 ensemble of models increases the likelihood of identifying better performing models that may be  
466 more relevant to the condition being investigated.

467

468 An important factor affecting the performance of extracted models is the quality of the parent  
469 genome-scale model. While curated models such as those for *E. coli* benefit from a wealth of  
470 available literature, thereby leading to models with very high specificity and sensitivity, less  
471 studied and more complex organisms do not enjoy the same luxury. For example, the parent  
472 genome-scale model for 786O, Recon2.2, has a very low sensitivity of 0.02. This indicates a need  
473 for developing algorithms that leverage gene knockout data in addition to gene expression data for  
474 extracting accurate context-specific models. Better model extraction algorithms that can accurately  
475 capture the biological state of the cell will simplify the model reduction step commonly performed  
476 before computationally intensive analyses such as 13C-MFA (Sacco and Young, 2021), kinetic  
477 modeling (Islam et al., 2021), hybrid models (Khaleghi et al., 2021), and models integrating other  
478 cell processes with metabolism, such as signaling pathways, protein secretion, and many other  
479 processes (Elseman et al., 2022; Gutierrez et al., 2020; Karr et al., 2012). This will expand the  
480 coverage of biological data that can be integrated with metabolic models to gain novel insights  
481 into the biology of the organism, study the progression of diseases, identify novel therapeutics,  
482 and inform metabolic engineering strategies in production hosts.

## 483 **4. Methods**

### 484 **4.1. Models and Data Sources**

485 The metabolic models *iJO1366* (Orth et al., 2011), Recon 2.2 (Swainston et al., 2016), and  
486 *iCHO1766* (Hefzi et al., 2016) for *E. coli*, human metabolism, and Chinese hamster ovary (CHO-  
487 S) cells were used as parent genome-scale models for extraction of context-specific models.  
488 Published glucose uptake rate, growth rate, and acetate secretion rate for *E. coli* grown in M9

489 Minimal Medium were used (Leighty and Antoniewicz, 2013). Glucose uptake rate, lactate  
490 secretion rate, growth rate, and uptake and secretion rates for amino acids were obtained from the  
491 NCI-60 database for the 786O renal cancer cell line (Jain et al., 2012; Opdam et al., 2017) and  
492 from literature for the CHO-S cell line (Hefzi et al., 2016). Gene expression data for *E. coli* grown  
493 in M9 minimal medium, 786O, and CHO-S were obtained from previously published data by  
494 Monk et al. (2016), the NCI-60 database (Klijn et al., 2015), and previously published data by  
495 Hefzi et al. (2016), respectively.

#### 496 **4.2. Model and Data Preprocessing**

497 Gene expression data were converted to reaction expression scores using a gene-protein-reaction  
498 (GPR) relationship. A GPR relationship is a Boolean expression that relates genes products to  
499 enzymes catalyzing a reaction. An OR relationship indicates that a reaction can be catalyzed by  
500 multiple isozymes. In this case, the reaction expression score is computed as the maximum  
501 expression of the genes encoding the different isozymes. Association of multiple subunits is  
502 modeled using the AND relationship. The reaction expression score for an AND relationship is  
503 evaluated as the minimum expression of the genes encoding the various subunits. Reactions  
504 without GPR relationships or with missing gene expression data were assigned an expression score  
505 of -1. These scores were used to identify global thresholding approaches. Expression scores using  
506 StanDep were computed as described by Joshi et al. (2020) whereas local T2 thresholding was  
507 performed as described by Richelle et al. (2019b). These approaches enable the better retention of  
508 more lowly expressed housekeeping genes and reactions (Joshi et al., 2022). Flux variability  
509 analysis (Mahadevan and Schilling, 2003) was performed to identify and remove inactive reactions  
510 so that all reactions in the parent models used for transcriptomics-based model extraction are flux  
511 consistent.

### 512 4.3. Model Extraction Methods

513 GIMME (Becker and Palsson, 2008) requires as inputs one expression threshold and assignment  
514 of a reaction as the required metabolic function (RMF). Values corresponding to the 60<sup>th</sup>, 75<sup>th</sup>, and  
515 80<sup>th</sup> percentile in the reaction expression scores were applied as thresholds to determine which  
516 reactions must be removed. For expression scores computed using StanDep and the local T2  
517 approach, thresholds of 0 and  $5 \cdot \ln(2)$ , respectively were applied. The biomass reaction was  
518 selected as the RMF reaction for all three organisms and a mandatory minimum of 90% of the  
519 maximum growth rate was enforced during model extraction. Since GIMME solves a linear  
520 programming problem to identify context-specific models, alternate solutions were identified by  
521 imposing an integer cut that eliminates previously identified solutions (Maranas and Zomorodi,  
522 2016).

523 iMAT (Zur et al., 2010) requires one threshold for high expression reactions and one for low  
524 expression reactions. For the global thresholding cases, expression scores corresponding to the  
525 60<sup>th</sup>, 75<sup>th</sup>, and 80<sup>th</sup> percentile were used to identify core reactions that must be included in the  
526 extracted model, whereas scores corresponding to the 20<sup>th</sup> percentile were considered inactive  
527 reactions for removal. For StanDep and the local T2 cases, equal upper and lower threshold of 1  
528 and  $5 \cdot \ln(2)$ , respectively were applied. Because iMAT does not inherently protect flux through  
529 the RMF reaction, a lower bound of 90% of the maximum biomass flux was enforced in the MILP  
530 formulation of the iMAT case. As with GIMME, alternate solutions were identified using integer  
531 cuts.

532 MBA (Jerby et al., 2010) requires two sets of reactions be provided as inputs: one set  
533 corresponding to high confidence reactions that must be included in the extracted model and a  
534 medium confidence set that is maximally retained. For the global thresholding cases, reactions

535 with scores above the 60<sup>th</sup>, 75<sup>th</sup>, and 80<sup>th</sup> percentile were considered high confidence reactions  
536 whereas those with scores above the 40<sup>th</sup> percentile but not part of the high confidence set were  
537 included in the medium confidence set. For StanDep, reactions with expression score greater than  
538 110% of that method's cluster threshold were considered high confidence reactions and reactions  
539 with expression scores between 90% and 110% were considered medium confidence reactions  
540 (Joshi et al., 2020). For the local T2 case, reactions with scores above the 75<sup>th</sup> percentile were high  
541 confidence reactions and those with scores greater than  $5 \cdot \ln(2)$  and below the 75<sup>th</sup> percentile were  
542 included in the medium confidence set. Alternate solutions were generated by permuting the  
543 removal order of low confidence reactions. In addition to ensuring flux consistency of the high  
544 expression reaction set, a minimum flux of 90% of the maximum growth rate was enforced as a  
545 criterion for removing reactions to ensure that all models in the ensemble can predict a biologically  
546 meaningful growth rate. A separate ensemble was also generated using the conventional  
547 implementation of MBA in which the biomass formation reaction is added to the set of high  
548 confidence reactions.

549 mCADRE (Wang et al., 2012) requires ubiquity scores to be provided as an input. Ubiquity scores  
550 for the global threshold cases were computed by normalizing reaction expression scores by the  
551 applied global threshold. Ubiquity scores for StanDep were computed as previously described by  
552 Joshi et al. For the local T2 case, ubiquity scores were calculated by normalizing expression scores  
553 to  $5 \cdot \ln(2)$  after applying appropriate local thresholds. Reactions with a ubiquity score greater than  
554 1 were flagged as core reactions to be protected during model extraction. Because mCADRE ranks  
555 non-core reactions based on expression and connectivity evidence, only a subset of non-core  
556 reactions of equal rank can be permuted. Alternate solutions were identified by permuting the  
557 removal order of this subset of reactions. As with MBA, a minimum of 90% of the maximum

558 growth rate was enforced as an additional criterion for model pruning. An ensemble was also  
559 generated using conventional mCADRE with the biomass formation reaction added to the set of  
560 core reactions.

561 All algorithms were implemented in the COBRA Toolbox (Heirendt et al., 2019) in MATLAB<sup>®</sup>.

#### 562 4.4. Analysis of Ensembles

563 The similarity of two models ( $model_i$  and  $model_j$ ) in any ensemble is quantified using the Jaccard  
564 Index defined as follows:

$$565 J_{ij} = \frac{\{Reactions\ in\ model_i\} \cap \{Reactions\ in\ model_j\}}{\{Reactions\ in\ model_i\} \cup \{Reactions\ in\ model_j\}}$$

#### 566 4.5. Validation of Extracted Models

567 Gene essentiality data inferred from gene knockout studies were used to screen ensembles of  
568 context-specific models. In silico gene essentiality was determined by computing the reduction in  
569 the growth rate upon inactivating one gene at a time in every extracted context-specific model.  
570 Genes were considered *in silico* essential if the predicted growth rate in the knockout model fell  
571 below 5% of the growth rate predicted by the original context-specific model. The quality of  
572 extracted context-specific models was evaluated by comparing model predictions of gene  
573 essentiality with experimentally determined gene essentiality. Gene essentiality data for WT *E.*  
574 *coli* grown in M9 Minimal medium was obtained from the KEIO collection (Baba et al., 2006).  
575 For the 786O cell line, gene essentiality was determined based on the CERES scores published in  
576 the NCI-60 database (Meyers et al., 2017). Genes with a CERES score less than zero were  
577 considered essential. The list of essential genes in CHO was obtained from (Xiong et al., 2021).  
578 Genes correctly predicted as non-essential were classified as true positive (TP) predictions,

579 incorrectly predicted as essential were classified as false negative (FN) predictions, correctly  
580 predicted as essential were classified as true negative (TN) predictions, whereas those incorrectly  
581 predicted as non-essential were classified as false positive (FP) predictions. The specificity and  
582 sensitivity of the models were computed using the following expressions.

|                                                                                                                                  |     |
|----------------------------------------------------------------------------------------------------------------------------------|-----|
| $\text{specificity} = \frac{\# \text{ of } TN \text{ genes}}{\# \text{ of } TN \text{ genes} + \# \text{ of } FP \text{ genes}}$ | (1) |
| $\text{sensitivity} = \frac{\# \text{ of } TP \text{ genes}}{\# \text{ of } TP \text{ genes} + \# \text{ of } FN \text{ genes}}$ | (2) |

583  
584 All extracted models and gene dispensability predictions are reported in the supplementary  
585 material.

#### 586 **Acknowledgements:**

587 This work was supported by funding generously provided by Amgen, the Novo Nordisk  
588 Foundation (NNF20SA0066621) and NIGMS (R35 GM119850).

589

#### 590 **Figure Captions**

591

#### 592 **Figure 1**

593 Retention of required metabolic functions. Box and Whisker plots show the distribution of the  
594 maximum growth rate predicted by extracted models relative to the maximum growth rate  
595 predicted by the genome-scale model for E. coli, 786O, and CHO-S using GIMME, iMAT, MBA,  
596 and mCADRE.

#### 597 **Figure 2**

598 Size distribution of models in the ensemble generated using GIMME, iMAT, MBA, and  
599 mCADRE for E. coli, 786O and CHO-S with the global 60<sup>th</sup> percentile threshold, global 75<sup>th</sup>  
600 percentile threshold, global 80<sup>th</sup> percentile threshold, StanDep, and the local T2 threshold.

601



602 **Figure 3**

- 603 (A) Fraction of conserved reactions in models extracted using GIMME, iMAT, MBA, and  
604 mCADRE for *E. coli*, 786O, and CHO-S with various thresholds.  
605 (B) Fraction of reactions from various pathways (0 representing no variable reactions and 1  
606 representing all variable reactions) contributing to alternate solutions in models extracted  
607 using GIMME, iMAT, MBA, and mCADRE for *E. coli*, 786O, and CHO-S with various  
608 thresholds

609

610 **Figure 4**

- 611 (A) Improvement in quality of models extracted using GIMME, iMAT, MBA, and mCADRE  
612 for *E. coli*, 786O, and CHO-S compared to the parent genome-scale models. The ideal  
613 model correctly classifies all essential and non-essential reactions and therefore, has a  
614 specificity and sensitivity equal to 1. The distance from the ideal model is calculated as  
615  $\sqrt{(1 - \text{sensitivity})^2 + (1 - \text{specificity})^2}$ .  
616 (B) Receiver Operating Characteristic (ROC) plot showing the improvement in model  
617 performance of the best models extracted using GIMME, iMAT, MBA, and mCADRE  
618 relative to the parent genome-scale model in *E. coli*, 786O, and CHO-S.

619

620 **Figure 5**

621 Generalized workflow pipeline for extracting context-specific models using gene-expression data

622

623

624 **References**

- 625 Agren, R., Bordel, S., Mardinoglu, A., Pornputtapong, N., Nookaew, I., and Nielsen, J. (2012).  
626 Reconstruction of genome-scale active metabolic networks for 69 human cell types and 16 cancer types  
627 using INIT. *PLoS Comput Biol* 8, e1002518.  
628 Agren, R., Mardinoglu, A., Asplund, A., Kampf, C., Uhlen, M., and Nielsen, J. (2014). Identification of  
629 anticancer drugs for hepatocellular carcinoma through personalized genome-scale metabolic modeling.  
630 *Mol Syst Biol* 10, 721.  
631 Åkesson, M., Förster, J., and Nielsen, J. (2004). Integration of gene expression data into genome-scale  
632 metabolic models. *Metabolic Engineering* 6, 285-293.  
633 Baba, T., Ara, T., Hasegawa, M., Takai, Y., Okumura, Y., Baba, M., Datsenko, K.A., Tomita, M., Wanner, B.L.,  
634 and Mori, H. (2006). Construction of *Escherichia coli* K-12 in-frame, single-gene knockout mutants: the  
635 Keio collection. *Mol Syst Biol* 2, 2006 0008.  
636 Becker, S.A., and Palsson, B.O. (2008). Context-specific metabolic networks are consistent with  
637 experiments. *PLoS Comput Biol* 4, e1000082.

638 Blais, E.M., Rawls, K.D., Dougherty, B.V., Li, Z.I., Kolling, G.L., Ye, P., Wallqvist, A., and Papin, J.A. (2017).  
639 Reconciled rat and human metabolic networks for comparative toxicogenomics and biomarker  
640 predictions. *Nat Commun* 8, 14250.  
641 Blazier, A.S., and Papin, J.A. (2012). Integration of expression data in genome-scale metabolic network  
642 reconstructions. *Front Physiol* 3, 299.  
643 Bordbar, A., Feist, A.M., Usaite-Black, R., Woodcock, J., Palsson, B.O., and Famili, I. (2011). A multi-tissue  
644 type genome-scale metabolic network for analysis of whole-body systems physiology. *BMC Syst Biol* 5,  
645 180.  
646 Borrageiro, G., Haylett, W., Seedat, S., Kuivaniemi, H., and Bardien, S. (2018). A review of genome-wide  
647 transcriptomics studies in Parkinson's disease. *Eur J Neurosci* 47, 1-16.  
648 Burke, E.E., Chenoweth, J.G., Shin, J.H., Collado-Torres, L., Kim, S.K., Micali, N., Wang, Y., Colantuoni, C.,  
649 Straub, R.E., Hoepfner, D.J., et al. (2020). Dissecting transcriptomic signatures of neuronal differentiation  
650 and maturation using iPSCs. *Nat Commun* 11, 462.  
651 Dickson, I. (2021). Full-spectrum transcriptomics in NAFLD. *Nat Rev Gastroenterol Hepatol* 18, 82.  
652 Ebrahim, A., Almaas, E., Bauer, E., Bordbar, A., Burgard, A.P., Chang, R.L., Drager, A., Famili, I., Feist, A.M.,  
653 Fleming, R.M., et al. (2015). Do genome-scale models need exact solvers or clearer standards? *Mol Syst*  
654 *Biol* 11, 831.  
655 Elseman, I.E., Rodriguez Prado, A., Grigaitis, P., Garcia Albornoz, M., Harman, V., Holman, S.W., van  
656 Heerden, J., Bruggeman, F.J., Bisschops, M.M.M., Sonnenschein, N., et al. (2022). Whole-cell modeling in  
657 yeast predicts compartment-specific proteome constraints that drive metabolic strategies. *Nat Commun*  
658 13, 801.  
659 Fouladiha, H., Marashi, S.A., Torkashvand, F., Mahboudi, F., Lewis, N.E., and Vaziri, B. (2020). A metabolic  
660 network-based approach for developing feeding strategies for CHO cells to increase monoclonal antibody  
661 production. *Bioprocess Biosyst Eng* 43, 1381-1389.  
662 Gopalakrishnan, S., Dash, S., and Maranas, C. (2020). K-FIT: An accelerated kinetic parameterization  
663 algorithm using steady-state fluxomic data. *Metab Eng* 61, 197-205.  
664 Gu, C., Kim, G.B., Kim, W.J., Kim, H.U., and Lee, S.Y. (2019). Current status and applications of genome-  
665 scale metabolic models. *Genome Biol* 20, 121.  
666 Gutierrez, J.M., Feizi, A., Li, S., Kallehauge, T.B., Hefzi, H., Grav, L.M., Ley, D., Baycin Hizal, D., Betenbaugh,  
667 M.J., Voldborg, B., et al. (2020). Genome-scale reconstructions of the mammalian secretory pathway  
668 predict metabolic costs and limitations of protein secretion. *Nat Commun* 11, 68.  
669 Hefzi, H., Ang, K.S., Hanscho, M., Bordbar, A., Ruckerbauer, D., Lakshmanan, M., Orellana, C.A., Baycin-  
670 Hizal, D., Huang, Y., Ley, D., et al. (2016). A Consensus Genome-scale Reconstruction of Chinese Hamster  
671 Ovary Cell Metabolism. *Cell Syst* 3, 434-443 e438.  
672 Heirendt, L., Arreckx, S., Pfau, T., Mendoza, S.N., Richelle, A., Heinken, A., Haraldsdottir, H.S., Wachowiak,  
673 J., Keating, S.M., Vlasov, V., et al. (2019). Creation and analysis of biochemical constraint-based models  
674 using the COBRA Toolbox v.3.0. *Nat Protoc* 14, 639-702.  
675 Islam, M.M., Schroeder, W.L., and Saha, R. (2021). Kinetic modeling of metabolism: Present and future.  
676 *Current Opinion in Systems Biology* 26, 72-78.  
677 Jain, M., Nilsson, R., Sharma, S., Madhusudhan, N., Kitami, T., Souza, A.L., Kafri, R., Kirschner, M.W., Clish,  
678 C.B., and Mootha, V.K. (2012). Metabolite profiling identifies a key role for glycine in rapid cancer cell  
679 proliferation. *Science* 336, 1040-1044.  
680 Jerby, L., Shlomi, T., and Ruppin, E. (2010). Computational reconstruction of tissue-specific metabolic  
681 models: application to human liver metabolism. *Mol Syst Biol* 6, 401.  
682 Joshi, C.J., Ke, W., Drangowska-Way, A., O'Rourke, E.J., and Lewis, N.E. (2022). What are housekeeping  
683 genes? *PLoS Comput Biol* 18, e1010295.  
684 Joshi, C.J., Schinn, S.M., Richelle, A., Shamie, I., O'Rourke, E.J., and Lewis, N.E. (2020). StanDep: Capturing  
685 transcriptomic variability improves context-specific metabolic models. *PLoS Comput Biol* 16, e1007764.

686 Karr, J.R., Sanghvi, J.C., Macklin, D.N., Gutschow, M.V., Jacobs, J.M., Bolival, B., Jr., Assad-Garcia, N., Glass,  
687 J.I., and Covert, M.W. (2012). A whole-cell computational model predicts phenotype from genotype. *Cell*  
688 *150*, 389-401.

689 Khaleghi, M.K., Savizi, I.S.P., Lewis, N.E., and Shojaosadati, S.A. (2021). Synergisms of machine learning  
690 and constraint-based modeling of metabolism for analysis and optimization of fermentation parameters.  
691 *Biotechnol J* *16*, e2100212.

692 Khodayari, A., and Maranas, C.D. (2016). A genome-scale *Escherichia coli* kinetic metabolic model k-  
693 *ecoli457* satisfying flux data for multiple mutant strains. *Nat Commun* *7*, 13806.

694 Klijn, C., Durinck, S., Stawiski, E.W., Haverty, P.M., Jiang, Z., Liu, H., Degenhardt, J., Mayba, O., Gnad, F.,  
695 Liu, J., et al. (2015). A comprehensive transcriptional portrait of human cancer cell lines. *Nat Biotechnol*  
696 *33*, 306-312.

697 Kochanowski, K., Gerosa, L., Brunner, S.F., Christodoulou, D., Nikolaev, Y.V., and Sauer, U. (2017). Few  
698 regulatory metabolites coordinate expression of central metabolic genes in *Escherichia coli*. *Mol Syst Biol*  
699 *13*, 903.

700 Kori, M., and Yalcin Arga, K. (2018). Potential biomarkers and therapeutic targets in cervical cancer:  
701 Insights from the meta-analysis of transcriptomics data within network biomedicine perspective. *PLoS*  
702 *One* *13*, e0200717.

703 Kumar, A., Harrelson, T., Lewis, N.E., Gallagher, E.J., LeRoith, D., Shiloach, J., and Betenbaugh, M.J. (2014).  
704 Multi-Tissue Computational Modeling Analyzes Pathophysiology of Type 2 Diabetes in MKR Mice. *PLOS*  
705 *ONE* *9*, e102319.

706 Leighty, R.W., and Antoniewicz, M.R. (2013). COMPLETE-MFA: complementary parallel labeling  
707 experiments technique for metabolic flux analysis. *Metab Eng* *20*, 49-55.

708 Macklin, D.N., Ahn-Horst, T.A., Choi, H., Ruggero, N.A., Carrera, J., Mason, J.C., Sun, G., Agmon, E.,  
709 DeFelice, M.M., Maayan, I., et al. (2020). Simultaneous cross-evaluation of heterogeneous *E. coli* datasets  
710 via mechanistic simulation. *Science* *369*.

711 Mahadevan, R., and Schilling, C.H. (2003). The effects of alternate optimal solutions in constraint-based  
712 genome-scale metabolic models. *Metab Eng* *5*, 264-276.

713 Manzoni, C., Kia, D.A., Vandrovцова, J., Hardy, J., Wood, N.W., Lewis, P.A., and Ferrari, R. (2018). Genome,  
714 transcriptome and proteome: the rise of omics data and their integration in biomedical sciences. *Brief*  
715 *Bioinform* *19*, 286-302.

716 Maranas, C.D., and Zomorodi, A.R. (2016). Modeling with Binary Variables and MILP Fundamentals. In  
717 *Optimization Methods in Metabolic Networks*, pp. 81-106.

718 Mardinoglu, A., Agren, R., Kampf, C., Asplund, A., Uhlen, M., and Nielsen, J. (2014). Genome-scale  
719 metabolic modelling of hepatocytes reveals serine deficiency in patients with non-alcoholic fatty liver  
720 disease. *Nat Commun* *5*, 3083.

721 Masson, H.O., Borland, D., Reilly, J., Telleria, A., Shrivastava, S., Watson, M., Bustillo, L., Li, Z., Capps, L.,  
722 Kellman, B.P., et al. (2022). Inferring a cell's capabilities from omics data with ImmCellFie. *bioRxiv*,  
723 2022.2011.2016.516672.

724 Meyers, R.M., Bryan, J.G., McFarland, J.M., Weir, B.A., Sizemore, A.E., Xu, H., Dharia, N.V., Montgomery,  
725 P.G., Cowley, G.S., Pantel, S., et al. (2017). Computational correction of copy number effect improves  
726 specificity of CRISPR-Cas9 essentiality screens in cancer cells. *Nat Genet* *49*, 1779-1784.

727 Monk, J.M., Koza, A., Campodonico, M.A., Machado, D., Seoane, J.M., Palsson, B.O., Herrgard, M.J., and  
728 Feist, A.M. (2016). Multi-omics Quantification of Species Variation of *Escherichia coli* Links Molecular  
729 Features with Strain Phenotypes. *Cell Syst* *3*, 238-251 e212.

730 Nguyen, T.-M., Shafi, A., Nguyen, T., and Draghici, S. (2019). Identifying significantly impacted pathways:  
731 a comprehensive review and assessment. *Genome Biology* *20*, 203.

732 O'Brien, E.J., Lerman, J.A., Chang, R.L., Hyduke, D.R., and Palsson, B.O. (2013). Genome-scale models of  
733 metabolism and gene expression extend and refine growth phenotype prediction. *Mol Syst Biol* *9*, 693.

734 Opdam, S., Richelle, A., Kellman, B., Li, S., Zielinski, D.C., and Lewis, N.E. (2017). A Systematic Evaluation  
735 of Methods for Tailoring Genome-Scale Metabolic Models. *Cell Syst* 4, 318-329 e316.

736 Orth, J.D., Conrad, T.M., Na, J., Lerman, J.A., Nam, H., Feist, A.M., and Palsson, B.O. (2011). A  
737 comprehensive genome-scale reconstruction of *Escherichia coli* metabolism--2011. *Mol Syst Biol* 7, 535.

738 Pacheco, M.P., Bintener, T., Ternes, D., Kulms, D., Haan, S., Letellier, E., and Sauter, T. (2019). Identifying  
739 and targeting cancer-specific metabolism with network-based drug target prediction. *EBioMedicine* 43,  
740 98-106.

741 Pedrotty, D.M., Morley, M.P., and Cappola, T.P. (2012). Transcriptomic biomarkers of cardiovascular  
742 disease. *Prog Cardiovasc Dis* 55, 64-69.

743 Richelle, A., Chiang, A.W.T., Kuo, C.C., and Lewis, N.E. (2019a). Increasing consensus of context-specific  
744 metabolic models by integrating data-inferred cell functions. *PLoS Comput Biol* 15, e1006867.

745 Richelle, A., Joshi, C., and Lewis, N.E. (2019b). Assessing key decisions for transcriptomic data integration  
746 in biochemical networks. *PLoS Comput Biol* 15, e1007185.

747 Richelle, A., Kellman, B.P., Wenzel, A.T., Chiang, A.W.T., Reagan, T., Gutierrez, J.M., Joshi, C., Li, S., Liu, J.K.,  
748 Masson, H., et al. (2021). Model-based assessment of mammalian cell metabolic functionalities using  
749 omics data. *Cell Reports Methods* 1, 100040.

750 Robaina-Estevez, S., and Nikoloski, Z. (2017). On the effects of alternative optima in context-specific  
751 metabolic model predictions. *PLoS Comput Biol* 13, e1005568.

752 Robaina Estevez, S., and Nikoloski, Z. (2014). Generalized framework for context-specific metabolic model  
753 extraction methods. *Front Plant Sci* 5, 491.

754 Rossell, S., Huynen, M.A., and Notebaart, R.A. (2013). Inferring metabolic states in uncharacterized  
755 environments using gene-expression measurements. *PLoS Comput Biol* 9, e1002988.

756 Sacco, S.A., and Young, J.D. (2021). <sup>13</sup>C metabolic flux analysis in cell line and bioprocess development.  
757 *Current Opinion in Chemical Engineering* 34, 100718.

758 Schinn, S.M., Morrison, C., Wei, W., Zhang, L., and Lewis, N.E. (2021a). A genome-scale metabolic network  
759 model and machine learning predict amino acid concentrations in Chinese Hamster Ovary cell cultures.  
760 *Biotechnol Bioeng* 118, 2118-2123.

761 Schinn, S.M., Morrison, C., Wei, W., Zhang, L., and Lewis, N.E. (2021b). Systematic evaluation of  
762 parameters for genome-scale metabolic models of cultured mammalian cells. *Metab Eng* 66, 21-30.

763 Schultz, A., and Qutub, A.A. (2016). Reconstruction of Tissue-Specific Metabolic Networks Using CORDA.  
764 *PLoS Comput Biol* 12, e1004808.

765 Swainston, N., Smallbone, K., Hefzi, H., Dobson, P.D., Brewer, J., Hanscho, M., Zielinski, D.C., Ang, K.S.,  
766 Gardiner, N.J., Gutierrez, J.M., et al. (2016). Recon 2.2: from reconstruction to model of human  
767 metabolism. *Metabolomics* 12, 109.

768 Thiele, I., and Palsson, B.O. (2010). A protocol for generating a high-quality genome-scale metabolic  
769 reconstruction. *Nat Protoc* 5, 93-121.

770 Thiele, I., Swainston, N., Fleming, R.M., Hoppe, A., Sahoo, S., Aurich, M.K., Haraldsdottir, H., Mo, M.L.,  
771 Rolfsson, O., Stobbe, M.D., et al. (2013). A community-driven global reconstruction of human metabolism.  
772 *Nat Biotechnol* 31, 419-425.

773 Uhlen, M., Fagerberg, L., Hallstrom, B.M., Lindskog, C., Oksvold, P., Mardinoglu, A., Sivertsson, A., Kampf,  
774 C., Sjostedt, E., Asplund, A., et al. (2015). Proteomics. Tissue-based map of the human proteome. *Science*  
775 347, 1260419.

776 Uhlen, M., Hallstrom, B.M., Lindskog, C., Mardinoglu, A., Ponten, F., and Nielsen, J. (2016). Transcriptomics  
777 resources of human tissues and organs. *Mol Syst Biol* 12, 862.

778 Vlassis, N., Pacheco, M.P., and Sauter, T. (2014). Fast reconstruction of compact context-specific metabolic  
779 network models. *PLoS Comput Biol* 10, e1003424.

780 Wang, Y., Eddy, J.A., and Price, N.D. (2012). Reconstruction of genome-scale metabolic models for 126  
781 human tissues using mCADRE. *BMC Syst Biol* 6, 153.

782 Watcham, S., Kucinski, I., and Gottgens, B. (2019). New insights into hematopoietic differentiation  
783 landscapes from single-cell RNA sequencing. *Blood* 133, 1415-1426.  
784 Xiong, K., la Cour Karottki, K.J., Hefzi, H., Li, S., Grav, L.M., Li, S., Spahn, P., Lee, J.S., Ventura, I., Lee, G.M.,  
785 et al. (2021). An optimized genome-wide, virus-free CRISPR screen for mammalian cells. *Cell Reports*  
786 *Methods* 1, 100062.  
787 Zielinski, D.C., Jamshidi, N., Corbett, A.J., Bordbar, A., Thomas, A., and Palsson, B.O. (2017). Systems  
788 biology analysis of drivers underlying hallmarks of cancer cell metabolism. *Sci Rep* 7, 41241.  
789 Zur, H., Ruppin, E., and Shlomi, T. (2010). iMAT: an integrative metabolic analysis tool. *Bioinformatics* 26,  
790 3140-3142.

791
